# Supplementary material
Source: Royal Society of Chemistry journal article supplement (doi:10.1039/d6em00369a)
Supplement: d6em00369a1.pdf [file d6em00369a1.pdf]

# Supporting Information for “Sublethal toxicity assessments of 7PPD-quinone and 77PD-quinone in zebrafish embryos and sac-fry”

Kyoshiro Hiki <sup>a,b,\*</sup>, Chenyang Rao <sup>b,c,d</sup>, Riping Huang <sup>b</sup>, and Hiroshi Yamamoto <sup>b</sup>

a: Department of Urban Engineering, The University of Tokyo, 7-3-1 Hongo, Bunkyo-ku, Tokyo 113-8656, Japan

b: Health and Environmental Risk Division, National Institute for Environmental Studies, 16-2 Onogawa, Tsukuba, Ibaraki, 305-8506, Japan

c: Institute of Hydrobiology, Chinese Academy of Sciences, Wuhan 430072, PR China

d: University of Chinese Academy of Sciences, Beijing 100049, PR China

\*Address correspondence to hikik@env.t.u-tokyo.ac.go.jp, hiki.1225@gmail.com

## Table of contents

|                |           | Content                                                                  | Page |
|----------------|-----------|--------------------------------------------------------------------------|------|
| <b>Tables</b>  | Table S1  | Measured concentration of 7PPD-Q and 77PD-Q                              | S2   |
|                | Table S2  | Average number of observed abnormal appearances in each beaker at 96 hpf | S3   |
|                | Table S3  | Area of eye and head in each individual at 72 hpf                        | S4   |
| <b>Figures</b> | Figure S1 | Effects of 7PPD-Q and 77PD-Q on ratio of eye to head sizes               | S7   |

Table S1. Measured concentration of 7PPD-Q and 77PD-Q.

|         |           | Day 0            | Day 1            | Day 1            | Day 3            | Day 3            | Day 6            | TWA                        |
|---------|-----------|------------------|------------------|------------------|------------------|------------------|------------------|----------------------------|
|         |           | New <sup>a</sup> | Old <sup>b</sup> | New <sup>a</sup> | Old <sup>b</sup> | New <sup>a</sup> | Old <sup>b</sup> | concentration <sup>c</sup> |
| Control |           | < LOQ                      |
| DMSO    |           | < LOQ                      |
| 7PPD-Q  | 125 µg/L  | 178              | 130 ± 25         | 129              | 166 ± 4          | 146              | 136 ± 8          | 147                        |
|         | 250 µg/L  | 282              | 259 ± 1          | 308              | 329 ± 14         | 206              | 353 ± 15         | 287                        |
|         | 500 µg/L  | 509              | 482 ± 22         | 418              | 484 ± 58         | 611              | 523 ± 7          | 504                        |
|         | 1000 µg/L | 1093             | 778 ± 3          | 1090             | 841 ± 25         | 1039             | 752 ± 36         | 925                        |
|         | 2000 µg/L | 2004             | 1512 ± 126       | 1684             | 1521 ± 114       | 2046             | 1303 ± 246       | 1665                       |
| 77PD-Q  | 125 µg/L  | 182              | 131 ± 6          | 162              | 127 ± 3          | 162              | 147 ± 23         | 151                        |
|         | 250 µg/L  | 313              | 233 ± 9          | 283              | 226 ± 5          | 264              | 273 ± 4          | 264                        |
|         | 500 µg/L  | 475              | 459 ± 50         | 506              | 478 ± 19         | 453              | 516 ± 27         | 481                        |
|         | 1000 µg/L | 1000             | 738 ± 62         | 1000             | 936 ± 41         | 891              | 868 ± 14         | 903                        |
|         | 2000 µg/L | 2061             | 1619 ± 26        | 1998             | 1848 ± 148       | 1859             | 1766 ± 209       | 1855                       |

a: Samples were taken just after preparation of spiked solution.

b: Samples were taken from exposure beaker before water replacement.

c: Time-weighted average concentration.

Table S2. Average number of observed abnormal appearances in each beaker at 96 hpf.

|         |           | Yolk and pericardial edema | Body curvature (lordosis, kyphosis, and scoliosis) | Blood congestion |
|---------|-----------|----------------------------|----------------------------------------------------|------------------|
| Control |           | 0 (0, 0, 0)                | 0.3 (0, 1, 0)                                      | 0 (0, 0, 0)      |
| DMSO    |           | 0.3 (0, 0, 1)              | 0.7 (1, 0, 1)                                      | 0 (0, 0, 0)      |
| 7PPD-Q  | 125 µg/L  | 0 (0, 0, 0)                | 0.3 (1, 0, 0)                                      | 0 (0, 0, 0)      |
|         | 250 µg/L  | 0.7 (0, 0, 2)              | 0.3 (0, 0, 1)                                      | 0 (0, 0, 0)      |
|         | 500 µg/L  | 0.7 (2, 0, 0)              | 0.3 (1, 0, 0)                                      | 0.3 (1, 0, 0)    |
|         | 1000 µg/L | 0.7 (1, 0, 1)              | 0.3 (1, 0, 0)                                      | 0.3 (0, 0, 1)    |
|         | 2000 µg/L | 0.3 (0, 0, 1)              | 0.3 (0, 0, 1)                                      | 0 (0, 0, 0)      |
| 77PD-Q  | 125 µg/L  | 0.3 (0, 1, 0)              | 0 (0, 0, 0)                                        | 0 (0, 0, 0)      |
|         | 250 µg/L  | 0 (0, 0, 0)                | 0 (0, 0, 0)                                        | 0 (0, 0, 0)      |
|         | 500 µg/L  | 0 (0, 1, 0)                | 0 (0, 0, 0)                                        | 0 (0, 0, 0)      |
|         | 1000 µg/L | 1.3 (2, 2, 0)              | 0 (0, 0, 0)                                        | 0 (0, 0, 0)      |
|         | 2000 µg/L | 0.7 (1, 0, 1)              | 0 (0, 0, 0)                                        | 0.3 (0, 0, 1)    |

Ten embryos were added to each beaker. Values in parentheses indicate the number of embryos with the abnormality in each beaker.

Table S3. Area of eye and head in each individual at 72 hpf (unit: mm<sup>2</sup>).

| Individual No. | Control |       | DMSO  |       | 7PPD-Q 125 µg/L |       | 7PPD-Q 250 µg/L |       |
|----------------|---------|-------|-------|-------|-----------------|-------|-----------------|-------|
|                | Eye     | Head  | Eye   | Head  | Eye             | Head  | Eye             | Head  |
| 1              | 0.071   | 0.136 | 0.072 | 0.144 | 0.064           | 0.148 | 0.061           | 0.129 |
| 2              | 0.053   | 0.113 | 0.065 | 0.125 | 0.067           | 0.126 | 0.062           | 0.126 |
| 3              | 0.066   | 0.142 | 0.067 | 0.144 | 0.056           | 0.118 | 0.061           | 0.128 |
| 4              | 0.051   | 0.111 | 0.054 | 0.145 | 0.059           | 0.120 | 0.062           | 0.133 |
| 5              | 0.053   | 0.105 | 0.054 | 0.114 | 0.061           | 0.129 | 0.070           | 0.150 |
| 6              | 0.052   | 0.116 | 0.059 | 0.116 | 0.061           | 0.126 | 0.061           | 0.126 |
| 7              | 0.055   | 0.105 | 0.061 | 0.113 | 0.057           | 0.116 | 0.052           | 0.109 |
| 8              | 0.050   | 0.102 | 0.065 | 0.137 | 0.061           | 0.118 | 0.059           | 0.111 |
| 9              | 0.058   | 0.128 | 0.064 | 0.139 | 0.061           | 0.120 | 0.053           | 0.111 |
| 10             | 0.060   | 0.120 | 0.062 | 0.143 | 0.062           | 0.119 | 0.054           | 0.094 |
| 11             | 0.065   | 0.130 | 0.064 | 0.123 | 0.061           | 0.120 | 0.061           | 0.114 |
| 12             | 0.077   | 0.140 | 0.065 | 0.120 | 0.053           | 0.106 | 0.061           | 0.111 |
| 13             | 0.076   | 0.134 | 0.066 | 0.150 | 0.062           | 0.127 | 0.062           | 0.138 |
| 14             | 0.070   | 0.127 | 0.056 | 0.110 | 0.056           | 0.106 | 0.063           | 0.116 |
| 15             | 0.059   | 0.114 | 0.071 | 0.139 | 0.066           | 0.109 | 0.070           | 0.133 |
| 16             | 0.063   | 0.137 | 0.057 | 0.144 | 0.061           | 0.116 |                 |       |
| 17             | 0.068   | 0.132 | 0.068 | 0.129 | 0.065           | 0.139 |                 |       |
| 18             | 0.069   | 0.153 |       |       |                 |       |                 |       |
| 19             | 0.065   | 0.136 |       |       |                 |       |                 |       |

Table S3. (continued)

| Individual<br>No. | 7PPD-Q 500 µg/L |       | 7PPD-Q 1000 µg/L |       | 7PPD-Q 2000 µg/L |       | 77PD-Q 125 µg/L |       |
|-------------------|-----------------|-------|------------------|-------|------------------|-------|-----------------|-------|
|                   | Eye             | Head  | Eye              | Head  | Eye              | Head  | Eye             | Head  |
| 1                 | 0.062           | 0.121 | 0.047            | 0.129 | 0.058            | 0.116 | 0.066           | 0.141 |
| 2                 | 0.062           | 0.116 | 0.054            | 0.114 | 0.059            | 0.129 | 0.065           | 0.123 |
| 3                 | 0.046           | 0.110 | 0.059            | 0.098 | 0.058            | 0.101 | 0.064           | 0.120 |
| 4                 | 0.057           | 0.119 | 0.064            | 0.134 | 0.059            | 0.105 | 0.063           | 0.124 |
| 5                 | 0.065           | 0.119 | 0.059            | 0.122 | 0.057            | 0.121 | 0.062           | 0.107 |
| 6                 | 0.062           | 0.130 | 0.058            | 0.116 | 0.056            | 0.115 | 0.061           | 0.143 |
| 7                 | 0.054           | 0.091 | 0.057            | 0.109 | 0.055            | 0.107 | 0.061           | 0.114 |
| 8                 | 0.056           | 0.097 | 0.064            | 0.141 | 0.055            | 0.123 | 0.062           | 0.135 |
| 9                 | 0.057           | 0.110 | 0.064            | 0.098 | 0.061            | 0.123 | 0.055           | 0.104 |
| 10                | 0.062           | 0.127 | 0.063            | 0.123 | 0.054            | 0.102 | 0.064           | 0.097 |
| 11                | 0.057           | 0.101 | 0.054            | 0.104 | 0.055            | 0.114 | 0.051           | 0.099 |
| 12                | 0.064           | 0.123 | 0.059            | 0.111 | 0.058            | 0.122 | 0.063           | 0.127 |
| 13                | 0.062           | 0.131 | 0.058            | 0.117 | 0.057            | 0.113 | 0.070           | 0.133 |
| 14                | 0.065           | 0.126 | 0.056            | 0.105 | 0.048            | 0.112 | 0.067           | 0.114 |
| 15                | 0.054           | 0.097 | 0.056            | 0.109 | 0.059            | 0.133 | 0.060           | 0.106 |
| 16                | 0.065           | 0.135 | 0.045            | 0.098 | 0.053            | 0.113 | 0.063           | 0.129 |
| 17                | 0.060           | 0.115 | 0.060            | 0.111 | 0.050            | 0.091 | 0.064           | 0.133 |
| 18                |                 |       | 0.054            | 0.145 | 0.061            | 0.126 | 0.065           | 0.123 |
| 19                |                 |       |                  |       | 0.061            | 0.124 |                 |       |

Table S3. (continued)

| Individual<br>No. | 77PD-Q 250 µg/L |       | 77PD-Q 500 µg/L |       | 77PD-Q 1000 µg/L |       | 77PD-Q 2000 µg/L |       |
|-------------------|-----------------|-------|-----------------|-------|------------------|-------|------------------|-------|
|                   | Eye             | Head  | Eye             | Head  | Eye              | Head  | Eye              | Head  |
| 1                 | 0.066           | 0.130 | 0.055           | 0.105 | 0.056            | 0.114 | 0.071            | 0.139 |
| 2                 | 0.052           | 0.116 | 0.060           | 0.118 | 0.056            | 0.120 | 0.052            | 0.087 |
| 3                 | 0.060           | 0.109 | 0.055           | 0.107 | 0.059            | 0.120 | 0.059            | 0.124 |
| 4                 | 0.062           | 0.110 | 0.053           | 0.109 | 0.051            | 0.112 | 0.052            | 0.109 |
| 5                 | 0.054           | 0.119 | 0.057           | 0.112 | 0.060            | 0.115 | 0.060            | 0.117 |
| 6                 | 0.068           | 0.141 | 0.058           | 0.118 | 0.054            | 0.116 | 0.059            | 0.121 |
| 7                 | 0.067           | 0.135 | 0.065           | 0.116 | 0.064            | 0.127 | 0.057            | 0.123 |
| 8                 | 0.068           | 0.126 | 0.062           | 0.122 | 0.054            | 0.105 | 0.059            | 0.134 |
| 9                 | 0.065           | 0.129 | 0.061           | 0.115 | 0.063            | 0.126 | 0.055            | 0.153 |
| 10                | 0.064           | 0.112 | 0.052           | 0.110 | 0.067            | 0.153 | 0.060            | 0.165 |
| 11                | 0.071           | 0.144 | 0.071           | 0.135 | 0.065            | 0.144 | 0.069            | 0.125 |
| 12                | 0.054           | 0.107 | 0.068           | 0.126 | 0.063            | 0.119 | 0.075            | 0.120 |
| 13                | 0.064           | 0.135 | 0.055           | 0.120 | 0.068            | 0.138 | 0.068            | 0.133 |
| 14                | 0.057           | 0.111 | 0.065           | 0.130 | 0.060            | 0.148 | 0.062            | 0.154 |
| 15                | 0.056           | 0.131 | 0.060           | 0.132 | 0.066            | 0.158 | 0.063            | 0.120 |
| 16                | 0.060           | 0.135 | 0.065           | 0.147 | 0.074            | 0.143 | 0.056            | 0.130 |
| 17                | 0.061           | 0.111 | 0.061           | 0.127 | 0.056            | 0.130 | 0.074            | 0.118 |
| 18                | 0.058           | 0.120 |                 |       | 0.064            | 0.150 | 0.061            | 0.110 |
| 19                | 0.068           | 0.142 |                 |       |                  |       |                  |       |

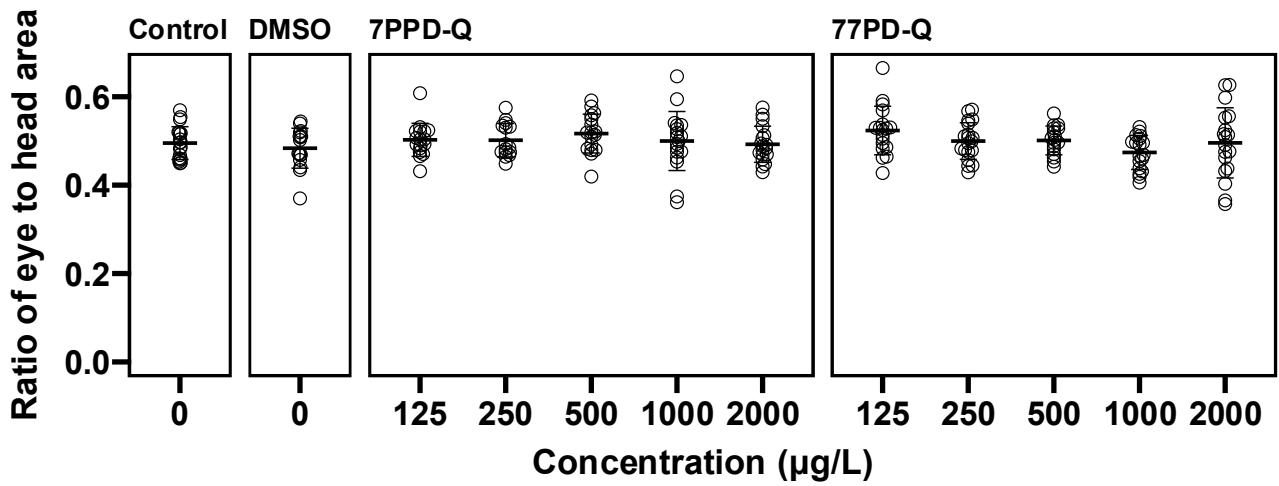

Figure S1. Effects of 7PPD-Q and 77PD-Q on ratio of eye to head sizes in zebrafish embryos. Bars and error bars represent mean values and standard deviations ( $n = 3$ ), respectively. No statistically significant differences from the DMSO control were observed.
